# Supplementary material
Source: publisher figshare collection journal article supplement (https://geolsoc.figshare.com/ndownloader/files/27181722)
Supplement: Supplementary file 1 [file 27181722]

Feature Importance	Feature	False PR	True PR		Resulting variables from TreeBagger
0.384	Min aspect	0	0
0.424	Max aspect	0	0.004291845
0.738	Range aspec	0	0.008583691
0.435	Mean aspect	0	0.012875536
0.743	STD aspect	0	0.017167382
0.447	Sum aspect	0	0.021459227
0.751	Min plan curvature	0	0.025751073
0.755	Max plan curvature	0	0.030042918
0.669	Range plan curvature	0	0.034334764
1.01	Mean plan curvature	0	0.038626609
1.08	STD plan curvature	0	0.042918455
1.03	Sum plan curvature	0	0.0472103
0.898	Min curvature	0	0.055793991
0.321	Max curvature	0	0.060085837
0.84	Range curvature	0	0.064377682
0.942	Mean curvature	0	0.068669528
0.836	STD curvature	0	0.072961373
0.934	Sum curvature	0	0.077253219
0.559	Min elevation	0	0.081545064
0.637	Max elevation	0	0.08583691
0.953	Range elevation	0	0.090128755
0.662	Mean elevation	0	0.094420601
1.06	STD elevation	0	0.098712446
0.577	Sum elevation	0.004310345	0.103004292
0.581	Min roughness	0.004310345	0.107296137
0.696	Max roughness	0.004310345	0.111587983
0.683	Range roughness	0.004310345	0.115879828
0.92	Mean roughness	0.004310345	0.120171674
0.685	STD roughness	0.004310345	0.124463519
0.951	Sum roughness	0.00862069	0.124463519
1.03	Min slope	0.00862069	0.128755365
0.489	Max slope	0.00862069	0.13304721
0.625	Range slope	0.00862069	0.137339056
0.605	Mean slope	0.00862069	0.141630901
0.751	STD slope	0.012931034	0.141630901
0.63	Sum slope	0.012931034	0.150214592
		0.012931034	0.154506438
		0.012931034	0.158798283
		0.012931034	0.163090129
		0.012931034	0.167381974
		0.012931034	0.17167382
		0.012931034	0.175965665
		0.012931034	0.180257511
		0.012931034	0.184549356
		0.012931034	0.188841202
		0.012931034	0.193133047
		0.012931034	0.197424893
		0.017241379	0.197424893
		0.017241379	0.201716738
		0.017241379	0.206008584
		0.017241379	0.210300429
		0.017241379	0.214592275
		0.017241379	0.21888412
		0.017241379	0.223175966
		0.017241379	0.227467811
		0.017241379	0.231759657
		0.017241379	0.236051502
		0.017241379	0.244635193
		0.017241379	0.248927039
		0.017241379	0.253218884
		0.017241379	0.25751073
		0.017241379	0.261802575
		0.017241379	0.266094421
		0.017241379	0.270386266
		0.017241379	0.274678112
		0.017241379	0.278969957
		0.017241379	0.283261803
		0.017241379	0.287553648
		0.017241379	0.291845494
		0.017241379	0.296137339
		0.017241379	0.300429185
		0.017241379	0.30472103
		0.017241379	0.309012876
		0.017241379	0.313304721
		0.017241379	0.317596567
		0.017241379	0.321888412
		0.017241379	0.326180258
		0.017241379	0.330472103
		0.017241379	0.334763948
		0.017241379	0.339055794
		0.017241379	0.343347639
		0.017241379	0.35193133
		0.017241379	0.356223176
		0.017241379	0.360515021
		0.017241379	0.364806867
		0.017241379	0.369098712
		0.017241379	0.373390558
		0.017241379	0.377682403
		0.017241379	0.381974249
		0.017241379	0.386266094
		0.017241379	0.39055794
		0.017241379	0.394849785
		0.017241379	0.399141631
		0.017241379	0.403433476
		0.017241379	0.407725322
		0.017241379	0.412017167
		0.017241379	0.416309013
		0.017241379	0.420600858
		0.017241379	0.424892704
		0.021551724	0.424892704
		0.021551724	0.429184549
		0.025862069	0.429184549
		0.025862069	0.433476395
		0.025862069	0.43776824
		0.025862069	0.442060086
		0.030172414	0.442060086
		0.030172414	0.446351931
		0.030172414	0.450643777
		0.030172414	0.454935622
		0.030172414	0.459227468
		0.034482759	0.459227468
		0.038793103	0.459227468
		0.043103448	0.459227468
		0.043103448	0.463519313
		0.043103448	0.467811159
		0.043103448	0.472103004
		0.047413793	0.472103004
		0.047413793	0.47639485
		0.047413793	0.484978541
		0.047413793	0.489270386
		0.047413793	0.493562232
		0.047413793	0.497854077
		0.047413793	0.502145923
		0.047413793	0.506437768
		0.047413793	0.510729614
		0.047413793	0.515021459
		0.047413793	0.519313305
		0.047413793	0.52360515
		0.047413793	0.527896996
		0.051724138	0.527896996
		0.051724138	0.536480687
		0.051724138	0.540772532
		0.051724138	0.545064378
		0.051724138	0.549356223
		0.056034483	0.549356223
		0.056034483	0.553648069
		0.056034483	0.557939914
		0.056034483	0.56223176
		0.056034483	0.566523605
		0.056034483	0.570815451
		0.060344828	0.570815451
		0.060344828	0.575107296
		0.060344828	0.579399142
		0.060344828	0.583690987
		0.060344828	0.592274678
		0.060344828	0.596566524
		0.060344828	0.600858369
		0.064655172	0.600858369
		0.064655172	0.605150215
		0.064655172	0.60944206
		0.068965517	0.60944206
		0.068965517	0.613733906
		0.068965517	0.618025751
		0.068965517	0.622317597
		0.068965517	0.626609442
		0.068965517	0.630901288
		0.073275862	0.630901288
		0.073275862	0.635193133
		0.073275862	0.639484979
		0.073275862	0.643776824
		0.073275862	0.64806867
		0.073275862	0.652360515
		0.073275862	0.656652361
		0.073275862	0.660944206
		0.077586207	0.660944206
		0.086206897	0.660944206
		0.090517241	0.660944206
		0.090517241	0.665236052
		0.090517241	0.669527897
		0.090517241	0.673819742
		0.090517241	0.678111588
		0.090517241	0.682403433
		0.090517241	0.686695279
		0.094827586	0.686695279
		0.099137931	0.686695279
		0.099137931	0.690987124
		0.099137931	0.69527897
		0.099137931	0.699570815
		0.103448276	0.699570815
		0.107758621	0.703862661
		0.107758621	0.708154506
		0.107758621	0.712446352
		0.107758621	0.716738197
		0.112068966	0.716738197
		0.11637931	0.716738197
		0.120689655	0.716738197
		0.120689655	0.721030043
		0.120689655	0.725321888
		0.120689655	0.729613734
		0.120689655	0.733905579
		0.120689655	0.738197425
		0.120689655	0.74248927
		0.125	0.74248927
		0.125	0.746781116
		0.125	0.751072961
		0.125	0.755364807
		0.129310345	0.755364807
		0.13362069	0.755364807
		0.137931034	0.755364807
		0.137931034	0.759656652
		0.137931034	0.763948498
		0.137931034	0.768240343
		0.142241379	0.768240343
		0.142241379	0.772532189
		0.142241379	0.78111588
		0.146551724	0.78111588
		0.146551724	0.785407725
		0.146551724	0.789699571
		0.146551724	0.793991416
		0.146551724	0.798283262
		0.146551724	0.802575107
		0.146551724	0.806866953
		0.150862069	0.806866953
		0.155172414	0.806866953
		0.155172414	0.811158798
		0.159482759	0.811158798
		0.163793103	0.811158798
		0.168103448	0.811158798
		0.168103448	0.815450644
		0.168103448	0.819742489
		0.172413793	0.819742489
		0.176724138	0.819742489
		0.176724138	0.824034335
		0.176724138	0.82832618
		0.181034483	0.82832618
		0.181034483	0.832618026
		0.185344828	0.832618026
		0.189655172	0.832618026
		0.189655172	0.836909871
		0.189655172	0.841201717
		0.193965517	0.841201717
		0.198275862	0.841201717
		0.202586207	0.841201717
		0.206896552	0.841201717
		0.206896552	0.845493562
		0.211206897	0.845493562
		0.211206897	0.849785408
		0.211206897	0.854077253
		0.215517241	0.854077253
		0.219827586	0.854077253
		0.224137931	0.854077253
		0.224137931	0.858369099
		0.224137931	0.862660944
		0.224137931	0.86695279
		0.224137931	0.871244635
		0.228448276	0.871244635
		0.228448276	0.875536481
		0.228448276	0.879828326
		0.228448276	0.884120172
		0.232758621	0.884120172
		0.237068966	0.884120172
		0.237068966	0.888412017
		0.24137931	0.888412017
		0.245689655	0.888412017
		0.25	0.888412017
		0.25	0.892703863
		0.25	0.896995708
		0.254310345	0.896995708
		0.25862069	0.901287554
		0.262931034	0.901287554
		0.267241379	0.901287554
		0.271551724	0.901287554
		0.271551724	0.905579399
		0.275862069	0.905579399
		0.280172414	0.905579399
		0.280172414	0.909871245
		0.284482759	0.909871245
		0.288793103	0.909871245
		0.293103448	0.909871245
		0.293103448	0.91416309
		0.297413793	0.91416309
		0.301724138	0.91416309
		0.306034483	0.91416309
		0.310344828	0.91416309
		0.314655172	0.91416309
		0.314655172	0.918454936
		0.318965517	0.922746781
		0.323275862	0.922746781
		0.323275862	0.927038627
		0.327586207	0.927038627
		0.331896552	0.927038627
		0.336206897	0.927038627
		0.336206897	0.931330472
		0.336206897	0.935622318
		0.340517241	0.935622318
		0.340517241	0.939914163
		0.340517241	0.944206009
		0.344827586	0.944206009
		0.349137931	0.944206009
		0.353448276	0.944206009
		0.357758621	0.944206009
		0.362068966	0.944206009
		0.36637931	0.944206009
		0.370689655	0.944206009
		0.375	0.944206009
		0.375	0.948497854
		0.379310345	0.948497854
		0.38362069	0.948497854
		0.38362069	0.9527897
		0.387931034	0.9527897
		0.392241379	0.9527897
		0.396551724	0.9527897
		0.400862069	0.9527897
		0.405172414	0.9527897
		0.409482759	0.9527897
		0.413793103	0.9527897
		0.418103448	0.9527897
		0.422413793	0.9527897
		0.426724138	0.9527897
		0.426724138	0.957081545
		0.426724138	0.961373391
		0.431034483	0.961373391
		0.435344828	0.961373391
		0.439655172	0.961373391
		0.443965517	0.961373391
		0.443965517	0.965665236
		0.448275862	0.965665236
		0.448275862	0.969957082
		0.452586207	0.969957082
		0.456896552	0.969957082
		0.461206897	0.969957082
		0.465517241	0.969957082
		0.469827586	0.969957082
		0.474137931	0.969957082
		0.478448276	0.969957082
		0.482758621	0.969957082
		0.487068966	0.969957082
		0.49137931	0.969957082
		0.495689655	0.969957082
		0.5	0.969957082
		0.5	0.974248927
		0.504310345	0.974248927
		0.50862069	0.974248927
		0.512931034	0.974248927
		0.517241379	0.974248927
		0.521551724	0.974248927
		0.525862069	0.974248927
		0.530172414	0.974248927
		0.534482759	0.974248927
		0.538793103	0.974248927
		0.543103448	0.974248927
		0.547413793	0.974248927
		0.551724138	0.974248927
		0.551724138	0.978540773
		0.556034483	0.978540773
		0.564655172	0.978540773
		0.564655172	0.982832618
		0.568965517	0.982832618
		0.573275862	0.982832618
		0.577586207	0.982832618
		0.586206897	0.982832618
		0.586206897	0.987124464
		0.590517241	0.987124464
		0.599137931	0.987124464
		0.603448276	0.987124464
		0.607758621	0.987124464
		0.612068966	0.987124464
		0.61637931	0.987124464
		0.620689655	0.987124464
		0.625	0.987124464
		0.629310345	0.987124464
		0.63362069	0.987124464
		0.637931034	0.987124464
		0.642241379	0.987124464
		0.646551724	0.987124464
		0.655172414	0.987124464
		0.659482759	0.987124464
		0.663793103	0.987124464
		0.668103448	0.987124464
		0.668103448	0.991416309
		0.672413793	0.991416309
		0.676724138	0.991416309
		0.681034483	0.991416309
		0.685344828	0.991416309
		0.689655172	0.991416309
		0.693965517	0.991416309
		0.698275862	0.991416309
		0.702586207	0.991416309
		0.706896552	0.991416309
		0.706896552	0.995708155
		0.711206897	1
		0.715517241	1
		0.719827586	1
		0.724137931	1
		0.728448276	1
		0.732758621	1
		0.737068966	1
		0.74137931	1
		0.745689655	1
		0.75	1
		0.754310345	1
		0.75862069	1
		0.762931034	1
		0.767241379	1
		0.771551724	1
		0.775862069	1
		0.780172414	1
		0.784482759	1
		0.788793103	1
		0.793103448	1
		0.797413793	1
		0.801724138	1
		0.806034483	1
		0.810344828	1
		0.814655172	1
		0.818965517	1
		0.823275862	1
		0.827586207	1
		0.831896552	1
		0.836206897	1
		0.840517241	1
		0.844827586	1
		0.849137931	1
		0.853448276	1
		0.857758621	1
		0.862068966	1
		0.86637931	1
		0.870689655	1
		0.875	1
		0.879310345	1
		0.88362069	1
		0.887931034	1
		0.892241379	1
		0.896551724	1
		0.900862069	1
		0.905172414	1
		0.909482759	1
		0.913793103	1
		0.918103448	1
		0.922413793	1
		0.926724138	1
		0.931034483	1
		0.935344828	1
		0.943965517	1
		0.948275862	1
		0.952586207	1
		0.956896552	1
		0.961206897	1
		0.965517241	1
		0.969827586	1
		0.974137931	1
		0.978448276	1
		0.982758621	1
		0.987068966	1
		0.99137931	1
		0.995689655	1
		1	1
